# Supplementary material
Source: publisher figshare collection journal article supplement (https://acs.figshare.com/ndownloader/files/5111716)
Supplement: Supplementary file 1 [file 5111716]

data_i6190
 
_audit_creation_method            SHELXL-97
_chemical_name_systematic
;
 ?
;
_chemical_name_common             ?
_chemical_melting_point           ?
_chemical_formula_moiety          ?
_chemical_formula_sum
 'C41 H41 Ir N4 O2'
_chemical_formula_weight          813.98
 
loop_
 _atom_type_symbol
 _atom_type_description
 _atom_type_scat_dispersion_real
 _atom_type_scat_dispersion_imag
 _atom_type_scat_source
 'C'  'C'   0.0033   0.0016
 'International Tables Vol C Tables 4.2.6.8 and 6.1.1.4'
 'H'  'H'   0.0000   0.0000
 'International Tables Vol C Tables 4.2.6.8 and 6.1.1.4'
 'N'  'N'   0.0061   0.0033
 'International Tables Vol C Tables 4.2.6.8 and 6.1.1.4'
 'O'  'O'   0.0106   0.0060
 'International Tables Vol C Tables 4.2.6.8 and 6.1.1.4'
 'Ir'  'Ir'  -1.4442   7.9887
 'International Tables Vol C Tables 4.2.6.8 and 6.1.1.4'
 
_symmetry_cell_setting            Monoclinic
_symmetry_space_group_name_H-M    P2(1)/n
 
loop_
 _symmetry_equiv_pos_as_xyz
 'x, y, z'
 '-x+1/2, y+1/2, -z+1/2'
 '-x, -y, -z'
 'x-1/2, -y-1/2, z-1/2'
 
_cell_length_a                    14.0518(3)
_cell_length_b                    17.3248(4)
_cell_length_c                    14.8368(3)
_cell_angle_alpha                 90.00
_cell_angle_beta                  106.0040(10)
_cell_angle_gamma                 90.00
_cell_volume                      3471.95(13)
_cell_formula_units_Z             4
_cell_measurement_temperature     293(2)
_cell_measurement_reflns_used     6741
_cell_measurement_theta_min       2.62
_cell_measurement_theta_max       25.14
 
_exptl_crystal_description        plate
_exptl_crystal_colour             red
_exptl_crystal_size_max           0.36
_exptl_crystal_size_mid           0.20
_exptl_crystal_size_min           0.18
_exptl_crystal_density_meas       0
_exptl_crystal_density_diffrn     1.557
_exptl_crystal_density_method     'not measured'
_exptl_crystal_F_000              1632
_exptl_absorpt_coefficient_mu     3.887
_exptl_absorpt_correction_type    none
_exptl_absorpt_correction_T_min   0.3351
_exptl_absorpt_correction_T_max   0.5413
_exptl_absorpt_process_details    ?
 
_exptl_special_details
;
 ?
;
 
_diffrn_ambient_temperature       293(2)
_diffrn_radiation_wavelength      0.71073
_diffrn_radiation_type            MoK\a
_diffrn_radiation_source          'fine-focus sealed tube'
_diffrn_radiation_monochromator   graphite
_diffrn_measurement_device_type   'CCD area detector'
_diffrn_measurement_method        'phi and omega scans'
_diffrn_detector_area_resol_mean  ?
_diffrn_standards_number          ?
_diffrn_standards_interval_count  ?
_diffrn_standards_interval_time   ?
_diffrn_standards_decay_%         ?
_diffrn_reflns_number             6075
_diffrn_reflns_av_R_equivalents   0.0303
_diffrn_reflns_av_sigmaI/netI     0.0185
_diffrn_reflns_limit_h_min        -16
_diffrn_reflns_limit_h_max        16
_diffrn_reflns_limit_k_min        0
_diffrn_reflns_limit_k_max        20
_diffrn_reflns_limit_l_min        0
_diffrn_reflns_limit_l_max        17
_diffrn_reflns_theta_min          1.77
_diffrn_reflns_theta_max          25.03
_reflns_number_total              6075
_reflns_number_gt                 4982
_reflns_threshold_expression      >2sigma(I)
 
_computing_data_collection        'Bruker SMART'
_computing_cell_refinement        'Bruker SMART'
_computing_data_reduction         'Bruker SAINT'
_computing_structure_solution     'SHELXS-97 (Sheldrick, 1990)'
_computing_structure_refinement   'SHELXL-97 (Sheldrick, 1997)'
_computing_molecular_graphics     'Ortep-3 for Windows (Farrugia, 1997)'
_computing_publication_material   'WinGX publication routines (Farrugia, 1999)'
 
_refine_special_details
;
 Refinement of F^2^ against ALL reflections.  The weighted R-factor wR and
 goodness of fit S are based on F^2^, conventional R-factors R are based
 on F, with F set to zero for negative F^2^. The threshold expression of
 F^2^ > 2sigma(F^2^) is used only for calculating R-factors(gt) etc. and is
 not relevant to the choice of reflections for refinement.  R-factors based
 on F^2^ are statistically about twice as large as those based on F, and R-
 factors based on ALL data will be even larger.
;
 
_refine_ls_structure_factor_coef  Fsqd
_refine_ls_matrix_type            full
_refine_ls_weighting_scheme       calc
_refine_ls_weighting_details
 'calc w=1/[\s^2^(Fo^2^)+(0.0840P)^2^+0.4890P] where P=(Fo^2^+2Fc^2^)/3'
_atom_sites_solution_primary      direct
_atom_sites_solution_secondary    difmap
_atom_sites_solution_hydrogens    geom
_refine_ls_hydrogen_treatment     mixed
_refine_ls_extinction_method      SHELXL
_refine_ls_extinction_coef        0.0078(4)
_refine_ls_extinction_expression
 'Fc^*^=kFc[1+0.001xFc^2^\l^3^/sin(2\q)]^-1/4^'
_refine_ls_number_reflns          6075
_refine_ls_number_parameters      442
_refine_ls_number_restraints      0
_refine_ls_R_factor_all           0.0510
_refine_ls_R_factor_gt            0.0328
_refine_ls_wR_factor_ref          0.1261
_refine_ls_wR_factor_gt           0.0839
_refine_ls_goodness_of_fit_ref    1.225
_refine_ls_restrained_S_all       1.225
_refine_ls_shift/su_max           0.104
_refine_ls_shift/su_mean          0.002
 
loop_
 _atom_site_label
 _atom_site_type_symbol
 _atom_site_fract_x
 _atom_site_fract_y
 _atom_site_fract_z
 _atom_site_U_iso_or_equiv
 _atom_site_adp_type
 _atom_site_occupancy
 _atom_site_symmetry_multiplicity
 _atom_site_calc_flag
 _atom_site_refinement_flags
 _atom_site_disorder_assembly
 _atom_site_disorder_group
C1 C 0.8300(5) 0.4069(4) 0.3422(4) 0.0510(16) Uani 1 1 d . . .
C2 C 0.9277(5) 0.4277(4) 0.3767(5) 0.0628(19) Uani 1 1 d . . .
H2 H 0.9394 0.4801 0.3881 0.075 Uiso 1 1 calc R . .
C3 C 1.0107(5) 0.3815(4) 0.3968(4) 0.0514(16) Uani 1 1 d . . .
C4 C 0.7519(5) 0.4681(4) 0.3215(6) 0.078(2) Uani 1 1 d . . .
H4A H 0.7064 0.4586 0.2612 0.117 Uiso 1 1 calc R . .
H4B H 0.7823 0.5177 0.3213 0.117 Uiso 1 1 calc R . .
H4C H 0.7169 0.4672 0.3687 0.117 Uiso 1 1 calc R . .
C5 C 1.1124(5) 0.4197(5) 0.4256(5) 0.070(2) Uani 1 1 d . . .
H5A H 1.1528 0.3950 0.4809 0.105 Uiso 1 1 calc R . .
H5B H 1.1052 0.4734 0.4384 0.105 Uiso 1 1 calc R . .
H5C H 1.1433 0.4148 0.3757 0.105 Uiso 1 1 calc R . .
C11 C 0.7633(4) 0.2320(3) 0.1520(4) 0.0354(13) Uani 1 1 d . . .
C12 C 0.7263(5) 0.2519(4) 0.0558(4) 0.0431(14) Uani 1 1 d . . .
H12 H 0.6591 0.2460 0.0266 0.052 Uiso 1 1 calc R . .
C13 C 0.7853(5) 0.2790(4) 0.0061(4) 0.0465(15) Uani 1 1 d . . .
C14 C 0.8878(5) 0.2891(4) 0.0526(4) 0.0436(14) Uani 1 1 d . . .
C15 C 0.9579(5) 0.3117(4) 0.0053(5) 0.0558(18) Uani 1 1 d . . .
H15 H 0.9373 0.3218 -0.0587 0.067 Uiso 1 1 calc R . .
C16 C 1.0562(5) 0.3188(5) 0.0529(5) 0.066(2) Uani 1 1 d . . .
H16 H 1.1014 0.3339 0.0209 0.080 Uiso 1 1 calc R . .
C17 C 1.0240(5) 0.2832(4) 0.1968(5) 0.0503(16) Uani 1 1 d . . .
H17 H 1.0466 0.2754 0.2612 0.060 Uiso 1 1 calc R . .
C18 C 1.0887(5) 0.3036(5) 0.1484(5) 0.0595(19) Uani 1 1 d . . .
H18 H 1.1557 0.3076 0.1795 0.071 Uiso 1 1 calc R . .
C19 C 0.9223(5) 0.2737(3) 0.1504(5) 0.0377(14) Uani 1 1 d . . .
C20 C 0.7434(5) 0.2975(5) -0.0964(4) 0.067(2) Uani 1 1 d . . .
H20A H 0.6726 0.3007 -0.1111 0.100 Uiso 1 1 calc R . .
H20B H 0.7615 0.2576 -0.1335 0.100 Uiso 1 1 calc R . .
H20C H 0.7695 0.3460 -0.1101 0.100 Uiso 1 1 calc R . .
C21 C 0.7593(4) 0.1754(3) 0.3002(4) 0.0359(12) Uani 1 1 d . . .
C22 C 0.7070(4) 0.1911(3) 0.2047(4) 0.0374(12) Uani 1 1 d . . .
C23 C 0.6115(4) 0.1618(4) 0.1673(4) 0.0411(14) Uani 1 1 d . . .
H23 H 0.5770 0.1738 0.1059 0.049 Uiso 1 1 calc R . .
C24 C 0.5675(4) 0.1154(4) 0.2203(4) 0.0446(14) Uani 1 1 d . . .
H24 H 0.5036 0.0970 0.1946 0.054 Uiso 1 1 calc R . .
C25 C 0.6186(4) 0.0959(3) 0.3123(4) 0.0432(13) Uani 1 1 d . . .
C26 C 0.7140(4) 0.1268(4) 0.3507(4) 0.0424(13) Uani 1 1 d . . .
H26 H 0.7479 0.1143 0.4121 0.051 Uiso 1 1 calc R . .
C27 C 0.4777(5) 0.0166(5) 0.3224(5) 0.077(2) Uani 1 1 d . . .
H27A H 0.4345 0.0572 0.2912 0.116 Uiso 1 1 calc R . .
H27B H 0.4519 -0.0057 0.3700 0.116 Uiso 1 1 calc R . .
H27C H 0.4819 -0.0223 0.2777 0.116 Uiso 1 1 calc R . .
C28 C 0.6382(6) 0.0043(5) 0.4392(6) 0.086(3) Uani 1 1 d . . .
H28A H 0.6813 -0.0274 0.4148 0.128 Uiso 1 1 calc R . .
H28B H 0.5985 -0.0279 0.4671 0.128 Uiso 1 1 calc R . .
H28C H 0.6770 0.0387 0.4857 0.128 Uiso 1 1 calc R . .
C31 C 0.9790(4) 0.1616(4) 0.5203(4) 0.0421(13) Uani 1 1 d . . .
C32 C 1.0175(5) 0.1523(4) 0.6177(4) 0.0511(16) Uani 1 1 d . . .
H32 H 1.0691 0.1176 0.6402 0.061 Uiso 1 1 calc R . .
C33 C 0.9817(5) 0.1925(4) 0.6798(4) 0.0507(16) Uani 1 1 d . . .
C34 C 0.8982(5) 0.2415(4) 0.6429(5) 0.0466(16) Uani 1 1 d . . .
C35 C 0.8517(6) 0.2851(5) 0.7004(5) 0.0600(19) Uani 1 1 d . . .
H35 H 0.8764 0.2820 0.7652 0.072 Uiso 1 1 calc R . .
C36 C 0.7732(5) 0.3307(5) 0.6635(5) 0.067(2) Uani 1 1 d . . .
H36 H 0.7448 0.3591 0.7027 0.081 Uiso 1 1 calc R . .
C37 C 0.7348(5) 0.3353(5) 0.5676(5) 0.0634(19) Uani 1 1 d . . .
H37 H 0.6794 0.3660 0.5428 0.076 Uiso 1 1 calc R . .
C38 C 0.7760(5) 0.2962(5) 0.5089(5) 0.0522(16) Uani 1 1 d . . .
H38 H 0.7481 0.2993 0.4444 0.063 Uiso 1 1 calc R . .
C39 C 0.8613(5) 0.2505(4) 0.5454(5) 0.0419(14) Uani 1 1 d . . .
C40 C 1.0291(5) 0.1865(5) 0.7838(4) 0.065(2) Uani 1 1 d . . .
H40A H 0.9835 0.1629 0.8132 0.098 Uiso 1 1 calc R . .
H40B H 1.0460 0.2372 0.8094 0.098 Uiso 1 1 calc R . .
H40C H 1.0879 0.1556 0.7951 0.098 Uiso 1 1 calc R . .
C41 C 0.9684(4) 0.1409(4) 0.3582(4) 0.0404(13) Uani 1 1 d . . .
C42 C 1.0139(4) 0.1197(4) 0.4523(4) 0.0447(14) Uani 1 1 d . . .
C43 C 1.0811(5) 0.0612(4) 0.4721(4) 0.0566(17) Uani 1 1 d . . .
H43 H 1.1094 0.0472 0.5343 0.068 Uiso 1 1 calc R . .
C44 C 1.1079(5) 0.0226(4) 0.4027(5) 0.0606(18) Uani 1 1 d . . .
H44 H 1.1549 -0.0165 0.4182 0.073 Uiso 1 1 calc R . .
C45 C 1.0647(5) 0.0416(4) 0.3070(5) 0.0548(16) Uani 1 1 d . . .
C46 C 0.9942(4) 0.1004(4) 0.2881(4) 0.0475(14) Uani 1 1 d . . .
H46 H 0.9634 0.1129 0.2259 0.057 Uiso 1 1 calc R . .
C47 C 1.0463(7) 0.0199(6) 0.1383(5) 0.091(3) Uani 1 1 d . . .
H47A H 1.0494 0.0745 0.1285 0.137 Uiso 1 1 calc R . .
H47B H 0.9784 0.0037 0.1220 0.137 Uiso 1 1 calc R . .
H47C H 1.0804 -0.0068 0.0997 0.137 Uiso 1 1 calc R . .
C48 C 1.1822(6) -0.0411(6) 0.2536(6) 0.090(3) Uani 1 1 d . . .
H48A H 1.2373 -0.0085 0.2829 0.135 Uiso 1 1 calc R . .
H48B H 1.1900 -0.0605 0.1955 0.135 Uiso 1 1 calc R . .
H48C H 1.1794 -0.0836 0.2944 0.135 Uiso 1 1 calc R . .
Ir1 Ir 0.883448(15) 0.233974(13) 0.342923(14) 0.03393(14) Uani 1 1 d . . .
N1 N 0.8583(4) 0.2478(3) 0.1998(4) 0.0356(11) Uani 1 1 d . . .
N2 N 0.9065(4) 0.2127(3) 0.4851(3) 0.0381(11) Uani 1 1 d . . .
N3 N 0.5756(4) 0.0480(3) 0.3652(4) 0.0568(14) Uani 1 1 d . . .
N4 N 1.0928(5) 0.0022(4) 0.2360(4) 0.078(2) Uani 1 1 d . . .
O1 O 0.7970(3) 0.3396(3) 0.3244(3) 0.0437(10) Uani 1 1 d . . .
O2 O 1.0118(3) 0.3080(3) 0.3927(3) 0.0466(10) Uani 1 1 d . . .
 
loop_
 _atom_site_aniso_label
 _atom_site_aniso_U_11
 _atom_site_aniso_U_22
 _atom_site_aniso_U_33
 _atom_site_aniso_U_23
 _atom_site_aniso_U_13
 _atom_site_aniso_U_12
C1 0.058(4) 0.040(4) 0.055(4) 0.006(3) 0.018(3) 0.000(3)
C2 0.061(4) 0.040(4) 0.084(5) -0.001(4) 0.014(4) -0.004(3)
C3 0.056(4) 0.053(4) 0.042(3) 0.003(3) 0.007(3) -0.007(3)
C4 0.059(4) 0.049(5) 0.122(7) 0.002(5) 0.018(4) 0.000(4)
C5 0.055(4) 0.071(5) 0.075(5) 0.008(4) 0.004(4) -0.017(4)
C11 0.036(3) 0.037(3) 0.030(3) -0.001(2) 0.005(2) 0.002(2)
C12 0.039(3) 0.056(4) 0.030(3) 0.001(3) 0.003(3) 0.003(3)
C13 0.052(4) 0.053(4) 0.032(3) 0.003(3) 0.008(3) 0.009(3)
C14 0.051(4) 0.045(3) 0.038(3) 0.003(3) 0.019(3) 0.005(3)
C15 0.061(4) 0.064(5) 0.047(4) 0.011(3) 0.022(3) 0.006(3)
C16 0.063(4) 0.075(5) 0.073(5) 0.008(4) 0.040(4) -0.003(4)
C17 0.045(3) 0.061(4) 0.045(4) 0.001(3) 0.013(3) -0.004(3)
C18 0.044(3) 0.074(6) 0.063(4) 0.005(4) 0.019(3) -0.005(4)
C19 0.043(3) 0.037(4) 0.035(3) 0.003(2) 0.014(3) 0.003(2)
C20 0.062(4) 0.100(6) 0.037(4) 0.011(4) 0.010(3) 0.006(4)
C21 0.041(3) 0.034(3) 0.031(3) -0.002(2) 0.006(2) 0.000(2)
C22 0.036(3) 0.042(3) 0.032(3) -0.002(2) 0.005(2) 0.000(2)
C23 0.037(3) 0.050(4) 0.032(3) -0.006(2) 0.001(2) 0.002(2)
C24 0.037(3) 0.054(4) 0.043(3) -0.008(3) 0.011(3) -0.005(3)
C25 0.046(3) 0.039(3) 0.046(3) 0.000(3) 0.016(3) -0.001(3)
C26 0.047(3) 0.048(4) 0.031(3) 0.003(3) 0.008(2) -0.005(3)
C27 0.073(5) 0.096(6) 0.067(5) -0.003(4) 0.026(4) -0.042(5)
C28 0.086(6) 0.072(6) 0.104(7) 0.035(5) 0.034(5) -0.008(5)
C31 0.045(3) 0.040(3) 0.036(3) 0.003(3) 0.004(2) -0.005(3)
C32 0.058(4) 0.055(4) 0.036(3) 0.007(3) 0.005(3) 0.003(3)
C33 0.057(4) 0.056(4) 0.034(3) 0.005(3) 0.004(3) -0.012(3)
C34 0.045(4) 0.055(4) 0.039(4) -0.002(3) 0.010(3) -0.013(3)
C35 0.064(5) 0.084(5) 0.035(4) -0.005(4) 0.019(3) -0.012(4)
C36 0.068(4) 0.086(6) 0.055(4) -0.011(4) 0.029(4) 0.005(4)
C37 0.062(4) 0.074(5) 0.060(4) 0.000(4) 0.026(4) 0.009(4)
C38 0.054(4) 0.060(4) 0.044(4) 0.006(3) 0.016(3) -0.001(3)
C39 0.044(4) 0.049(4) 0.033(4) -0.002(3) 0.012(3) -0.008(3)
C40 0.075(5) 0.076(6) 0.038(4) 0.007(3) 0.006(3) -0.004(4)
C41 0.039(3) 0.039(3) 0.041(3) 0.000(3) 0.007(3) 0.000(3)
C42 0.049(3) 0.042(4) 0.040(3) 0.003(3) 0.006(3) 0.004(3)
C43 0.060(4) 0.060(4) 0.044(4) 0.009(3) 0.004(3) 0.014(3)
C44 0.058(4) 0.059(4) 0.055(4) 0.003(3) 0.000(3) 0.017(3)
C45 0.059(4) 0.050(4) 0.056(4) -0.005(3) 0.016(3) 0.007(3)
C46 0.047(3) 0.049(4) 0.044(3) 0.000(3) 0.007(3) 0.002(3)
C47 0.111(7) 0.103(7) 0.070(5) -0.005(5) 0.044(5) 0.027(6)
C48 0.075(5) 0.093(7) 0.103(7) -0.012(6) 0.029(5) 0.024(5)
Ir1 0.03481(18) 0.0364(2) 0.02775(18) 0.00144(8) 0.00394(11) -0.00105(9)
N1 0.036(3) 0.042(3) 0.027(3) 0.001(2) 0.006(2) -0.001(2)
N2 0.034(2) 0.045(3) 0.033(3) 0.002(2) 0.005(2) -0.004(2)
N3 0.057(3) 0.060(4) 0.056(3) 0.011(3) 0.019(3) -0.012(3)
N4 0.097(5) 0.079(5) 0.059(4) -0.011(3) 0.021(3) 0.031(4)
O1 0.046(2) 0.040(3) 0.044(2) 0.0020(19) 0.0099(19) 0.0021(19)
O2 0.042(2) 0.051(3) 0.041(2) -0.001(2) 0.0026(18) -0.007(2)
 
_geom_special_details
;
 All esds (except the esd in the dihedral angle between two l.s. planes)
 are estimated using the full covariance matrix.  The cell esds are taken
 into account individually in the estimation of esds in distances, angles
 and torsion angles; correlations between esds in cell parameters are only
 used when they are defined by crystal symmetry.  An approximate (isotropic)
 treatment of cell esds is used for estimating esds involving l.s. planes.
;
 
loop_
 _geom_bond_atom_site_label_1
 _geom_bond_atom_site_label_2
 _geom_bond_distance
 _geom_bond_site_symmetry_2
 _geom_bond_publ_flag
C1 O1 1.256(8) . ?
C1 C2 1.375(10) . ?
C1 C4 1.495(9) . ?
C2 C3 1.378(9) . ?
C2 H2 0.9300 . ?
C3 O2 1.275(8) . ?
C3 C5 1.526(9) . ?
C4 H4A 0.9600 . ?
C4 H4B 0.9600 . ?
C4 H4C 0.9600 . ?
C5 H5A 0.9600 . ?
C5 H5B 0.9600 . ?
C5 H5C 0.9600 . ?
C11 N1 1.356(8) . ?
C11 C12 1.420(9) . ?
C11 C22 1.442(8) . ?
C12 C13 1.337(9) . ?
C12 H12 0.9300 . ?
C13 C14 1.426(9) . ?
C13 C20 1.507(8) . ?
C14 C15 1.413(9) . ?
C14 C19 1.423(9) . ?
C15 C16 1.372(10) . ?
C15 H15 0.9300 . ?
C16 C18 1.389(9) . ?
C16 H16 0.9300 . ?
C17 C18 1.351(9) . ?
C17 C19 1.414(9) . ?
C17 H17 0.9300 . ?
C18 H18 0.9300 . ?
C19 N1 1.382(8) . ?
C20 H20A 0.9600 . ?
C20 H20B 0.9600 . ?
C20 H20C 0.9600 . ?
C21 C26 1.394(8) . ?
C21 C22 1.430(7) . ?
C21 Ir1 1.965(5) . ?
C22 C23 1.398(7) . ?
C23 C24 1.385(8) . ?
C23 H23 0.9300 . ?
C24 C25 1.397(8) . ?
C24 H24 0.9300 . ?
C25 N3 1.389(7) . ?
C25 C26 1.409(8) . ?
C26 H26 0.9300 . ?
C27 N3 1.452(8) . ?
C27 H27A 0.9600 . ?
C27 H27B 0.9600 . ?
C27 H27C 0.9600 . ?
C28 N3 1.421(9) . ?
C28 H28A 0.9600 . ?
C28 H28B 0.9600 . ?
C28 H28C 0.9600 . ?
C31 N2 1.342(8) . ?
C31 C32 1.405(8) . ?
C31 C42 1.436(8) . ?
C32 C33 1.358(9) . ?
C32 H32 0.9300 . ?
C33 C34 1.429(10) . ?
C33 C40 1.506(8) . ?
C34 C39 1.405(10) . ?
C34 C35 1.426(11) . ?
C35 C36 1.344(11) . ?
C35 H35 0.9300 . ?
C36 C37 1.377(10) . ?
C36 H36 0.9300 . ?
C37 C38 1.355(9) . ?
C37 H37 0.9300 . ?
C38 C39 1.414(10) . ?
C38 H38 0.9300 . ?
C39 N2 1.395(9) . ?
C40 H40A 0.9600 . ?
C40 H40B 0.9600 . ?
C40 H40C 0.9600 . ?
C41 C46 1.384(8) . ?
C41 C42 1.414(8) . ?
C41 Ir1 1.982(6) . ?
C42 C43 1.361(9) . ?
C43 C44 1.365(9) . ?
C43 H43 0.9300 . ?
C44 C45 1.420(9) . ?
C44 H44 0.9300 . ?
C45 C46 1.394(9) . ?
C45 N4 1.401(8) . ?
C46 H46 0.9300 . ?
C47 N4 1.450(10) . ?
C47 H47A 0.9600 . ?
C47 H47B 0.9600 . ?
C47 H47C 0.9600 . ?
C48 N4 1.423(9) . ?
C48 H48A 0.9600 . ?
C48 H48B 0.9600 . ?
C48 H48C 0.9600 . ?
Ir1 N1 2.068(5) . ?
Ir1 N2 2.077(5) . ?
Ir1 O2 2.170(4) . ?
Ir1 O1 2.171(4) . ?
 
loop_
 _geom_angle_atom_site_label_1
 _geom_angle_atom_site_label_2
 _geom_angle_atom_site_label_3
 _geom_angle
 _geom_angle_site_symmetry_1
 _geom_angle_site_symmetry_3
 _geom_angle_publ_flag
O1 C1 C2 126.5(6) . . ?
O1 C1 C4 114.0(6) . . ?
C2 C1 C4 119.4(6) . . ?
C3 C2 C1 128.8(7) . . ?
C3 C2 H2 115.6 . . ?
C1 C2 H2 115.6 . . ?
O2 C3 C2 126.2(6) . . ?
O2 C3 C5 115.1(6) . . ?
C2 C3 C5 118.7(7) . . ?
C1 C4 H4A 109.5 . . ?
C1 C4 H4B 109.5 . . ?
H4A C4 H4B 109.5 . . ?
C1 C4 H4C 109.5 . . ?
H4A C4 H4C 109.5 . . ?
H4B C4 H4C 109.5 . . ?
C3 C5 H5A 109.5 . . ?
C3 C5 H5B 109.5 . . ?
H5A C5 H5B 109.5 . . ?
C3 C5 H5C 109.5 . . ?
H5A C5 H5C 109.5 . . ?
H5B C5 H5C 109.5 . . ?
N1 C11 C12 120.7(5) . . ?
N1 C11 C22 115.1(5) . . ?
C12 C11 C22 124.1(5) . . ?
C13 C12 C11 122.0(6) . . ?
C13 C12 H12 119.0 . . ?
C11 C12 H12 119.0 . . ?
C12 C13 C14 118.3(6) . . ?
C12 C13 C20 120.2(6) . . ?
C14 C13 C20 121.5(6) . . ?
C15 C14 C13 123.0(6) . . ?
C15 C14 C19 118.0(6) . . ?
C13 C14 C19 119.0(6) . . ?
C16 C15 C14 120.7(6) . . ?
C16 C15 H15 119.7 . . ?
C14 C15 H15 119.7 . . ?
C15 C16 C18 120.6(6) . . ?
C15 C16 H16 119.7 . . ?
C18 C16 H16 119.7 . . ?
C18 C17 C19 120.6(6) . . ?
C18 C17 H17 119.7 . . ?
C19 C17 H17 119.7 . . ?
C17 C18 C16 120.8(6) . . ?
C17 C18 H18 119.6 . . ?
C16 C18 H18 119.6 . . ?
N1 C19 C17 119.8(6) . . ?
N1 C19 C14 120.9(6) . . ?
C17 C19 C14 119.3(6) . . ?
C13 C20 H20A 109.5 . . ?
C13 C20 H20B 109.5 . . ?
H20A C20 H20B 109.5 . . ?
C13 C20 H20C 109.5 . . ?
H20A C20 H20C 109.5 . . ?
H20B C20 H20C 109.5 . . ?
C26 C21 C22 117.4(5) . . ?
C26 C21 Ir1 129.4(4) . . ?
C22 C21 Ir1 113.0(4) . . ?
C23 C22 C21 120.0(5) . . ?
C23 C22 C11 125.0(5) . . ?
C21 C22 C11 114.9(5) . . ?
C24 C23 C22 121.0(5) . . ?
C24 C23 H23 119.5 . . ?
C22 C23 H23 119.5 . . ?
C23 C24 C25 120.4(5) . . ?
C23 C24 H24 119.8 . . ?
C25 C24 H24 119.8 . . ?
N3 C25 C24 120.6(5) . . ?
N3 C25 C26 120.8(5) . . ?
C24 C25 C26 118.5(5) . . ?
C21 C26 C25 122.5(5) . . ?
C21 C26 H26 118.7 . . ?
C25 C26 H26 118.7 . . ?
N3 C27 H27A 109.5 . . ?
N3 C27 H27B 109.5 . . ?
H27A C27 H27B 109.5 . . ?
N3 C27 H27C 109.5 . . ?
H27A C27 H27C 109.5 . . ?
H27B C27 H27C 109.5 . . ?
N3 C28 H28A 109.5 . . ?
N3 C28 H28B 109.5 . . ?
H28A C28 H28B 109.5 . . ?
N3 C28 H28C 109.5 . . ?
H28A C28 H28C 109.5 . . ?
H28B C28 H28C 109.5 . . ?
N2 C31 C32 120.8(6) . . ?
N2 C31 C42 115.4(5) . . ?
C32 C31 C42 123.7(6) . . ?
C33 C32 C31 122.0(6) . . ?
C33 C32 H32 119.0 . . ?
C31 C32 H32 119.0 . . ?
C32 C33 C34 117.6(6) . . ?
C32 C33 C40 121.2(6) . . ?
C34 C33 C40 121.2(6) . . ?
C39 C34 C33 119.5(6) . . ?
C39 C34 C35 117.2(7) . . ?
C33 C34 C35 123.3(6) . . ?
C36 C35 C34 121.9(7) . . ?
C36 C35 H35 119.0 . . ?
C34 C35 H35 119.0 . . ?
C35 C36 C37 119.9(7) . . ?
C35 C36 H36 120.1 . . ?
C37 C36 H36 120.1 . . ?
C38 C37 C36 121.4(7) . . ?
C38 C37 H37 119.3 . . ?
C36 C37 H37 119.3 . . ?
C37 C38 C39 120.1(6) . . ?
C37 C38 H38 119.9 . . ?
C39 C38 H38 119.9 . . ?
N2 C39 C34 120.3(6) . . ?
N2 C39 C38 120.3(6) . . ?
C34 C39 C38 119.4(6) . . ?
C33 C40 H40A 109.5 . . ?
C33 C40 H40B 109.5 . . ?
H40A C40 H40B 109.5 . . ?
C33 C40 H40C 109.5 . . ?
H40A C40 H40C 109.5 . . ?
H40B C40 H40C 109.5 . . ?
C46 C41 C42 118.0(6) . . ?
C46 C41 Ir1 127.0(4) . . ?
C42 C41 Ir1 114.7(4) . . ?
C43 C42 C41 120.3(6) . . ?
C43 C42 C31 125.2(5) . . ?
C41 C42 C31 114.4(5) . . ?
C42 C43 C44 121.4(6) . . ?
C42 C43 H43 119.3 . . ?
C44 C43 H43 119.3 . . ?
C43 C44 C45 120.7(6) . . ?
C43 C44 H44 119.7 . . ?
C45 C44 H44 119.7 . . ?
C46 C45 N4 122.5(6) . . ?
C46 C45 C44 117.1(6) . . ?
N4 C45 C44 120.5(6) . . ?
C41 C46 C45 122.6(6) . . ?
C41 C46 H46 118.7 . . ?
C45 C46 H46 118.7 . . ?
N4 C47 H47A 109.5 . . ?
N4 C47 H47B 109.5 . . ?
H47A C47 H47B 109.5 . . ?
N4 C47 H47C 109.5 . . ?
H47A C47 H47C 109.5 . . ?
H47B C47 H47C 109.5 . . ?
N4 C48 H48A 109.5 . . ?
N4 C48 H48B 109.5 . . ?
H48A C48 H48B 109.5 . . ?
N4 C48 H48C 109.5 . . ?
H48A C48 H48C 109.5 . . ?
H48B C48 H48C 109.5 . . ?
C21 Ir1 C41 94.0(2) . . ?
C21 Ir1 N1 81.0(2) . . ?
C41 Ir1 N1 98.0(2) . . ?
C21 Ir1 N2 96.5(2) . . ?
C41 Ir1 N2 79.6(2) . . ?
N1 Ir1 N2 176.35(19) . . ?
C21 Ir1 O2 174.4(2) . . ?
C41 Ir1 O2 91.3(2) . . ?
N1 Ir1 O2 99.89(18) . . ?
N2 Ir1 O2 82.93(17) . . ?
C21 Ir1 O1 88.8(2) . . ?
C41 Ir1 O1 176.77(19) . . ?
N1 Ir1 O1 80.85(18) . . ?
N2 Ir1 O1 101.74(18) . . ?
O2 Ir1 O1 85.91(15) . . ?
C11 N1 C19 118.6(5) . . ?
C11 N1 Ir1 112.2(4) . . ?
C19 N1 Ir1 129.0(4) . . ?
C31 N2 C39 119.4(5) . . ?
C31 N2 Ir1 113.7(4) . . ?
C39 N2 Ir1 126.6(4) . . ?
C25 N3 C28 118.8(5) . . ?
C25 N3 C27 118.9(5) . . ?
C28 N3 C27 116.7(6) . . ?
C45 N4 C48 122.5(6) . . ?
C45 N4 C47 120.4(6) . . ?
C48 N4 C47 115.3(6) . . ?
C1 O1 Ir1 126.5(4) . . ?
C3 O2 Ir1 125.9(4) . . ?
 
_diffrn_measured_fraction_theta_max    0.989
_diffrn_reflns_theta_full              25.03
_diffrn_measured_fraction_theta_full   0.989
_refine_diff_density_max    2.375
_refine_diff_density_min   -1.739
_refine_diff_density_rms    0.477
